# Supplementary material for: Tuning disorder in structurally colored bioinspired photonic glasses
Source: Royal Society of Chemistry journal article supplement (doi:10.1039/d3sm01468a), 2024-01-01
Supplement: d3sm01468a1.pdf [file d3sm01468a1.pdf]

## Supplementary Information

### Tuning Disorder in Structurally Colored Bioinspired Photonic Glasses

Ahmet F. Demirörs<sup>1,\*</sup>, Kalpana Manne<sup>1</sup>, Sofia Magkiriadou<sup>1</sup> and Frank Scheffold<sup>1,2,\*</sup>

<sup>1</sup> Soft Matter and Photonics, Department of Physics, University of Fribourg, Chemin du Musée 3, 1700, Fribourg, Switzerland

<sup>2</sup> NCCR Bio-inspired Materials, University of Fribourg, 1700 Fribourg, Switzerland

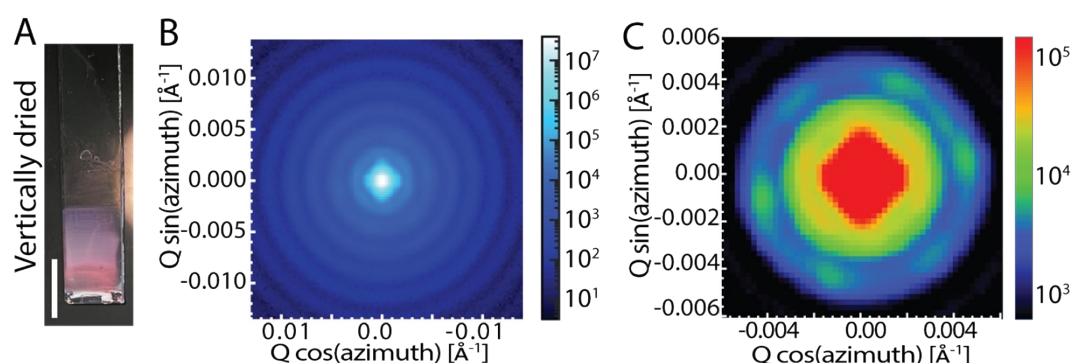

**Figure S1.** Scattering characterization of an ordered colloidal system obtained via vertical drying. Scale bar is 1 cm A) Photograph of a sample vertically dried from a 1 wt% dispersion of PS particles of 270 nm size. B) Small-Angle-X-Ray-Scattering (SAXS) patterns of the vertically dried sample. C) SAXS patterns of the same sample in (B) depicting the first ring of the pattern to highlight the inhomogeneity of the scattering ring pattern.

A dispersion of 0.1 wt% PS particles suspended in an ethanol: water mixture with 3:1 ratio was placed in an oven at 60 °C. The dispersion was let to evaporate in an open vial while having a glass slide inserted. The particles during evaporation deposited on the slide in a highly ordered fashion as described by Jiang et al.<sup>1</sup>

#### References:

1. Jiang, P., Bertone, J. F., Hwang, K. S. & Colvin, V. L. Single-Crystal Colloidal Multilayers of Controlled Thickness. *Chem. Mater.* **11**, 2132–2140 (1999).
